# Supplementary material
Source: Springer Nature journal article supplement (https://www.springermedizin.de/resource/supplementary/12916_2012_575_MOESM1_ESM.pdf/9598186)
Supplement: MOESM1 [file 9598186]

# Why Biomarkers Fail to Reach the Clinic

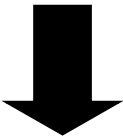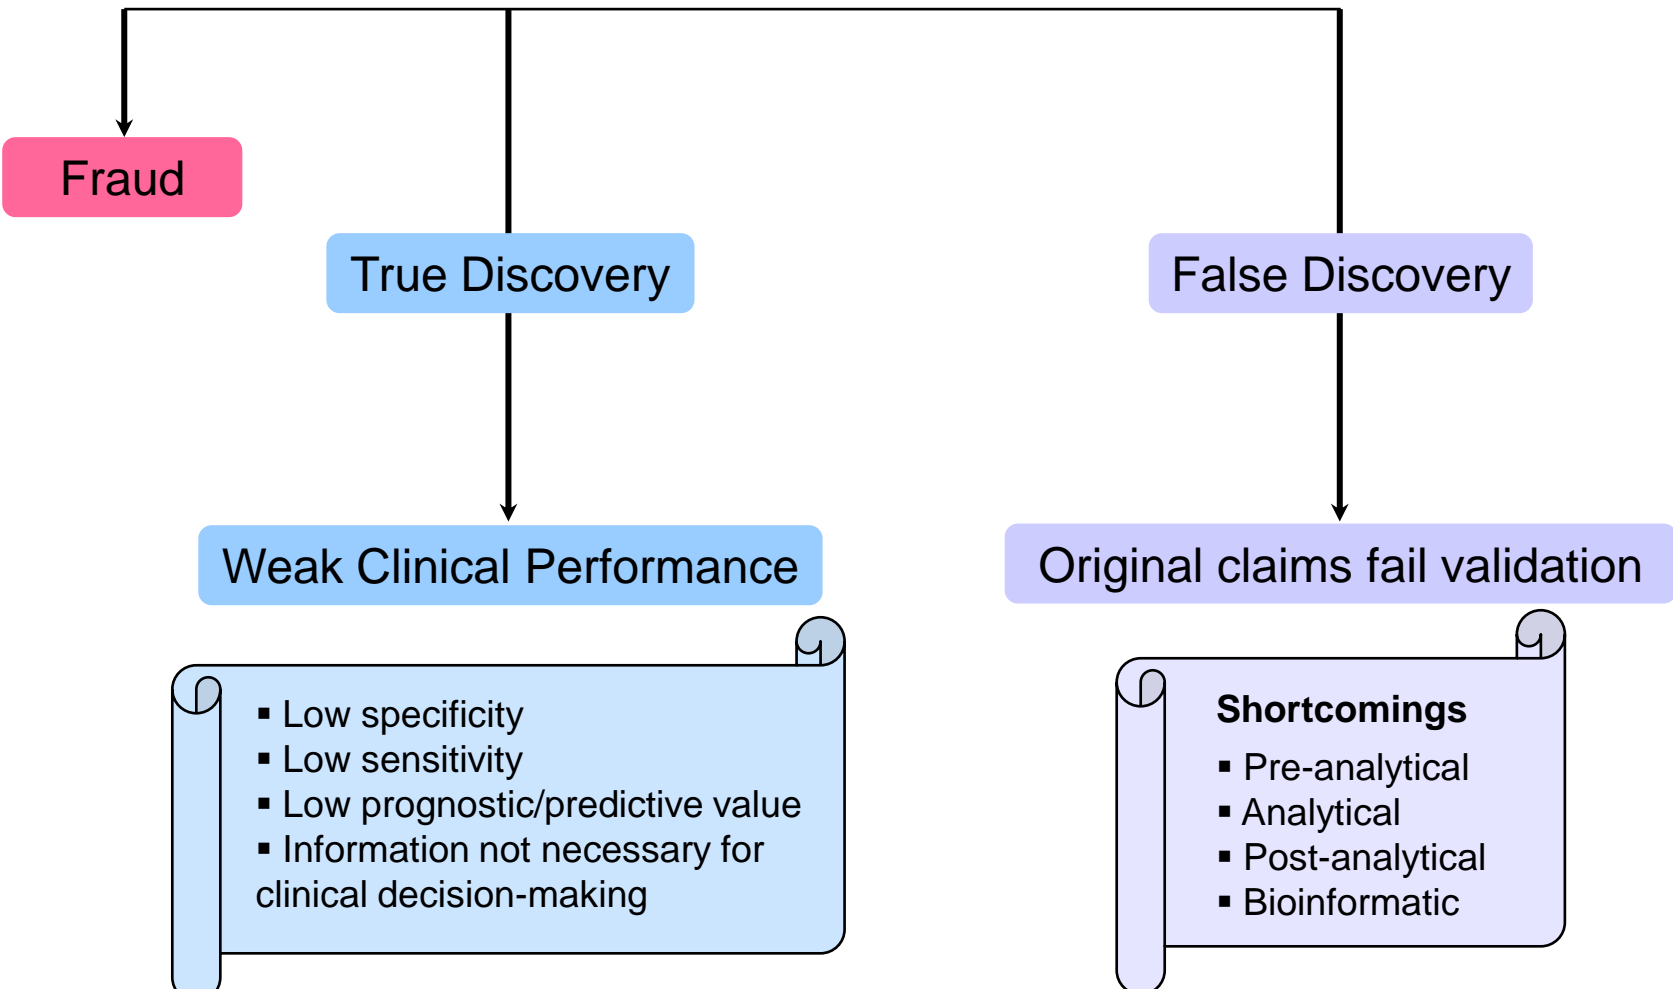

Fraud

True Discovery

False Discovery

Weak Clinical Performance

- Low specificity
- Low sensitivity
- Low prognostic/predictive value
- Information not necessary for clinical decision-making

Original claims fail validation

- Shortcomings**
- Pre-analytical
  - Analytical
  - Post-analytical
  - Bioinformatic
